# Supplementary material for: High-loading metal atoms on graphdiyne for efficient nitrogen fixation to ammonia
Source: Royal Society of Chemistry journal article supplement (doi:10.1039/d1ta08241h), 2021-11-03
Supplement: d1ta08241h1.pdf [file d1ta08241h1.pdf]

## Supporting Information

### **Highly Loading Metal Atoms on Graphdiyne for Efficient Nitrogen Fixation to Ammonia**

Yan Fang,<sup>a,c</sup> Yurui Xue,<sup>\*a,b</sup> Lan Hui,<sup>a,c</sup> Xi Chen<sup>a,c</sup> and Yuliang Li<sup>\*a,c</sup>

## Materials and methods

### Materials

Hexabromobenzene and tetrabutylammonium fluoride (TBAF) were purchased from J&K Scientific and Alfa Aesar, respectively.  $\text{MnSO}_4 \cdot \text{H}_2\text{O}$  was provided by Energy Chemical. Tetrahydrofuran (THF) and toluene were refluxed with sodium for several hours to remove residual water before applied in reaction. The other reagents were all used as received without any extra purification treatment unless specifically mentioned. Water used in this experiment was purified with a Millipore system.

### Preparation of graphdiyne nanosheets (GDY NSs)

GDY NSs were synthesized via an acetylenic cross-coupling reaction. Several nitric acid-treated carbon cloths (CC) and copper foils were immersed in pyridine solution and kept for 2 h at 80 °C. 50 mL 0.6 mg mL<sup>-1</sup> hexaethynylbenzene (HEB) solution dissolved in pyridine was added dropwise in 5 h into above solution and then the whole system was kept at 110 °C for 24 h under Ar atmosphere. It is noted that the reaction setup should be kept protection from light. After reaction, GDY NSs grown on CC substrate were taken out from the reactor and washed with dimethylformamide (DMF), acetone successively, and immersed in 0.5 M  $\text{H}_2\text{SO}_4$  for at least 12 h. Finally, the samples were washed with deionized water and ethanol and dried in air.

### Preparation of $\text{Mn}_{\text{SA}}/\text{GDY}$

A piece of freshly prepared GD NSs grown on CC was used as the cathode and immersed in 0.5 M  $\text{H}_2\text{SO}_4$  containing 50 mM  $\text{MnSO}_4 \cdot \text{H}_2\text{O}$  to allow sufficient adsorption of Mn species. Electrochemical deposition was performed under galvanostatic condition at a current density of 10 mA cm<sup>-2</sup> for 1800s on CHI 660E electrochemical Workstation. The obtained  $\text{Mn}_{\text{SA}}/\text{GDY}$  was washed with deionized water and ethanol successively, dried at 30 °C in vacuum and kept in Ar atmosphere before electrochemical tests.

### Characterizations

Scanning electron microscopy (SEM) images were obtained using an S-4800 field emission scanning electron microscope. Transmission electron microscopy (TEM), high-resolution transmission electron microscopy (HRTEM) and energy dispersive X-ray spectroscopy (EDX) tests were all carried out through a JEM-2100F electron microscope. High-angle annular dark-field scanning transmission electron microscopy (HAADF-STEM) images were obtained on the aberration-corrected cubed FEI Titan Cubed Themis G2 300 or JEM-ARM200F (JEOL, Tokyo, Japan) TEM/STEM operated at 200 kV with cold filed-emission gun and double hexapole Cs correctors (CEOS GmbH, Heidelberg, Germany). The attainable spatial resolution defined by the probe-forming objective lens is better than 80 pm. X-ray diffraction (XRD) was conducted on the Rigaku D/max-2500 rotation anode X-ray diffractometer using Cu K $\alpha$  radiation ( $\lambda = 1.54178 \text{ \AA}$ ). Raman spectroscopy was obtained through a Renishaw-2000 Raman spectrometer with a 473 nm excitation laser source. X-ray photoelectron spectroscopy (XPS) measurement was conducted on a Thermo Scientific ESCALab 250Xi instrument with monochromatic Al K $\alpha$ .

### Electrochemical tests

All the electrochemical measurements were carried out on CHI 660E electrochemical Workstation (CHI. 660D, Shanghai CH. Instruments, China). A gas purification set-up was equipped to conduct the electrochemical nitrogen reduction reaction (NRR) experiment. The electrochemical nitrogen reduction reaction was performed in a carefully cleaned H-type two-compartment cell separated by Nafion 117 membrane under ambient conditions. The Nafion 117 membranes used in this experiment were protonated by boiling in water for 1 h, in  $\text{H}_2\text{O}_2$  for 1 h and then in water for another 1 h, followed by being boiled in 0.5 M  $\text{H}_2\text{SO}_4$  for 3 h and in water for 6 h before measurement. All the boiling steps above were performed at 80 °C. Before each measurement, the feeding gas was carefully purified through a Cu-trap to remove possible impurities such as  $\text{NO}_x$  and other nitrogen compounds in order to eliminate the contributions of contaminates. 0.1 M  $\text{N}_2$ -saturated  $\text{Na}_2\text{SO}_4$  aqueous solution was freshly prepared as the electrolyte, the as-synthesized samples were directly used as the working electrode, the saturated calomel electrode (SCE) was used as the reference electrode, and the graphitic rod was used as the counter electrode. The NRR was performed for 1 h at each potential with high-purity  $\text{N}_2$  continuously bubbled to the surface of samples and then the electrolyte was collected for products detection and the sample was washed carefully. The NRR tests were repeated for 3 times at each applied potential in repetitive tests. The operations of argon

control experiments were the same as nitrogen reduction experiments except from the feeding gas. As for cycling stability test, electrolytes were collected at an interval of 1 h so as to detect ammonia products. The cell and tested samples were rinsed with deionized water for several times in order to remove purities and absorbed ammonia on the surface. And then the cleaned samples were immersed in fresh electrolytes again for the next electrochemical cycle.

#### **Detection and quantification of ammonia**

The electrochemical synthesized ammonia was detected through indophenol blue method. The calibration curve was determined as follows: 4 mL standard  $\text{NH}_4\text{Cl}$  solutions with series of concentrations in 0.1 M  $\text{Na}_2\text{SO}_4$  were mixed with 50  $\mu\text{L}$  oxidizing solution [ $\text{NaClO}$  ( $\rho\text{Cl} = 4\sim 4.9$ ) solution containing 0.75 M  $\text{NaOH}$ ], 500  $\mu\text{L}$  coloring solution (aqueous solution of 0.4 M  $\text{C}_7\text{H}_5\text{O}_3\text{Na}$  and 0.32 M  $\text{NaOH}$ ) and 50  $\mu\text{L}$  catalytic solution (aqueous solution of 1%  $\text{Na}_2[\text{Fe}(\text{NO})(\text{CN})_5]\cdot 2\text{H}_2\text{O}$ ) successively. UV-vis measurements were carried out within a range of 800 nm to 500 nm after standing at ambient conditions for 1 h. The calibration curve was obtained from the absorbance at 660 nm and calculated as:  $y = 0.0921x + 0.004$ ,  $R^2 = 0.999$ .

Ammonia yield ( $Y_{\text{NH}_3}$ ) was determined using the following equation:

$$Y_{\text{NH}_3} = \frac{(C_{\text{NH}_3} \times V)}{(t \times m)}$$

Where  $C_{\text{NH}_3}$  is the detected concentration of ammonia,  $V$  is the volume of electrolyte,  $t$  is the electrolysis time and  $m$  is the overall mass loading of electrocatalyst.

Faradaic efficiency (FE) was evaluated using the following equation:

$$\text{FE} = \frac{(3 \times F \times C_{\text{NH}_3} \times V)}{(17 \times Q)}$$

Where  $F$  is the Faradaic constant,  $C_{\text{NH}_3}$  is the detected concentration of ammonia,  $V$  is the volume of electrolyte and  $Q$  is the quantity of applied electricity.

#### **Detection of hydrazine**

The  $\text{N}_2\text{H}_4$  by-product was detected by Watt and Chrisp method. 2.5 mL electrolyte after NRR measurement was mixed with 2.5 mL color reagent (a mixture of 5.99 g  $\rho\text{-C}_9\text{H}_{11}\text{NO}$ , 30 mL  $\text{HCl}$  and 300 mL  $\text{C}_2\text{H}_5\text{OH}$ ), and then UV-vis spectrophotometer was performed within a range of 600 nm to 400 nm after standing at ambient conditions for 10 minutes. The  $\text{N}_2\text{H}_4$  was characterized by the peaks at 455 nm.

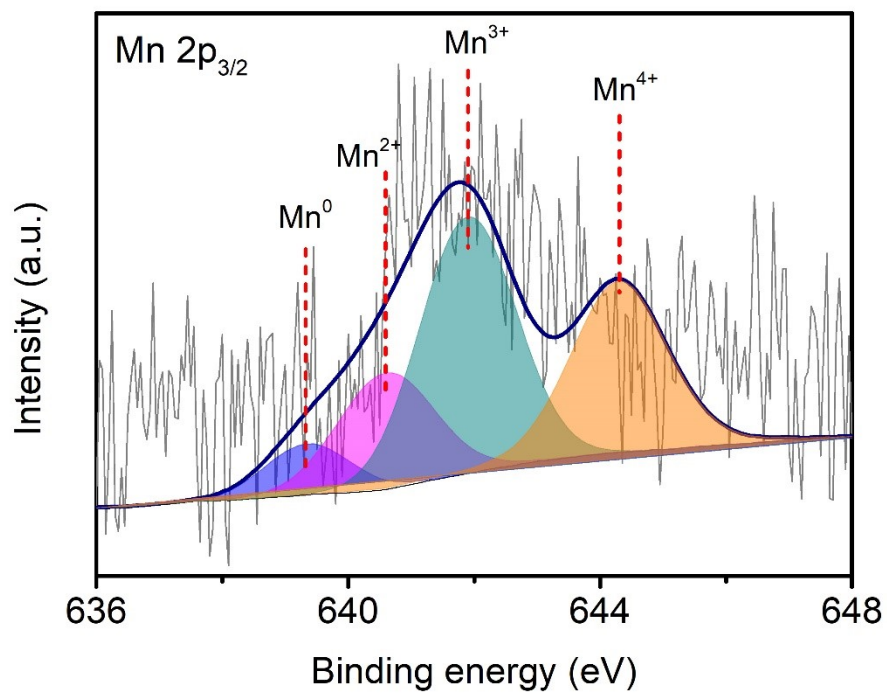

Fig. S1 High-resolution Mn 2p<sub>3/2</sub> XPS spectrum of Mn<sub>SA</sub>/GDY.

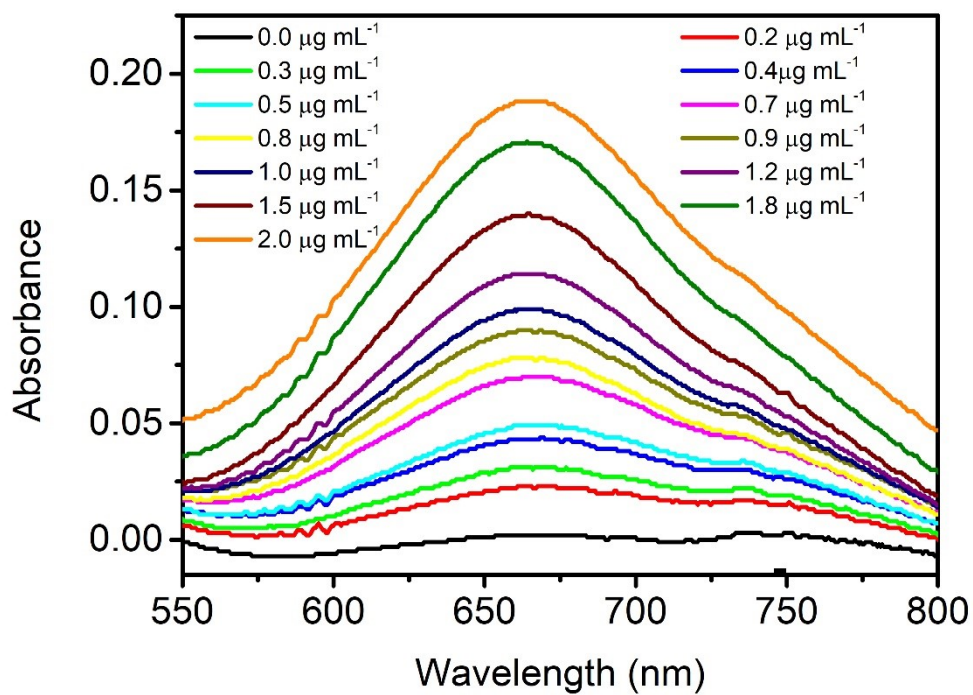

Fig. S2. UV-vis absorption spectra of indophenol assays with standard  $\text{NH}_4\text{Cl}$  solutions in 0.1 M  $\text{Na}_2\text{SO}_4$  after 1 h incubation at room temperature

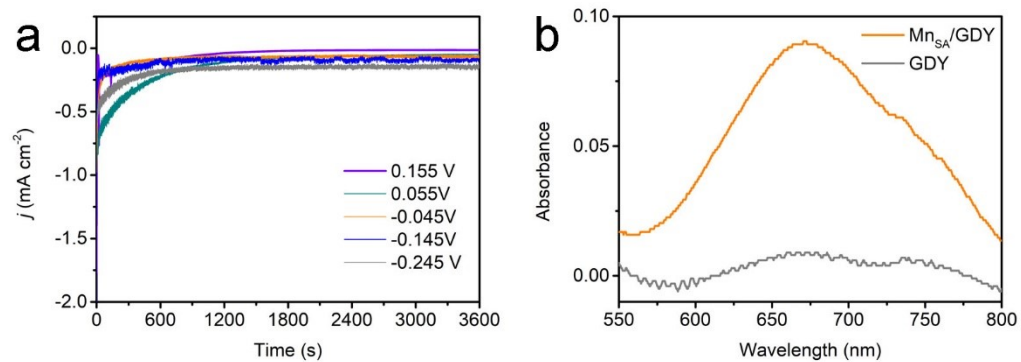

Fig. S3. (a) Chronoamperometry curves of Mn<sub>SA</sub>/GDY tested at different potentials in 0.1 M Na<sub>2</sub>SO<sub>4</sub>. (b) UV-vis absorption spectra of the 0.1 M Na<sub>2</sub>SO<sub>4</sub> electrolytes after NRR at -0.045 V versus RHE for Mn<sub>SA</sub>/GDY and GDY.

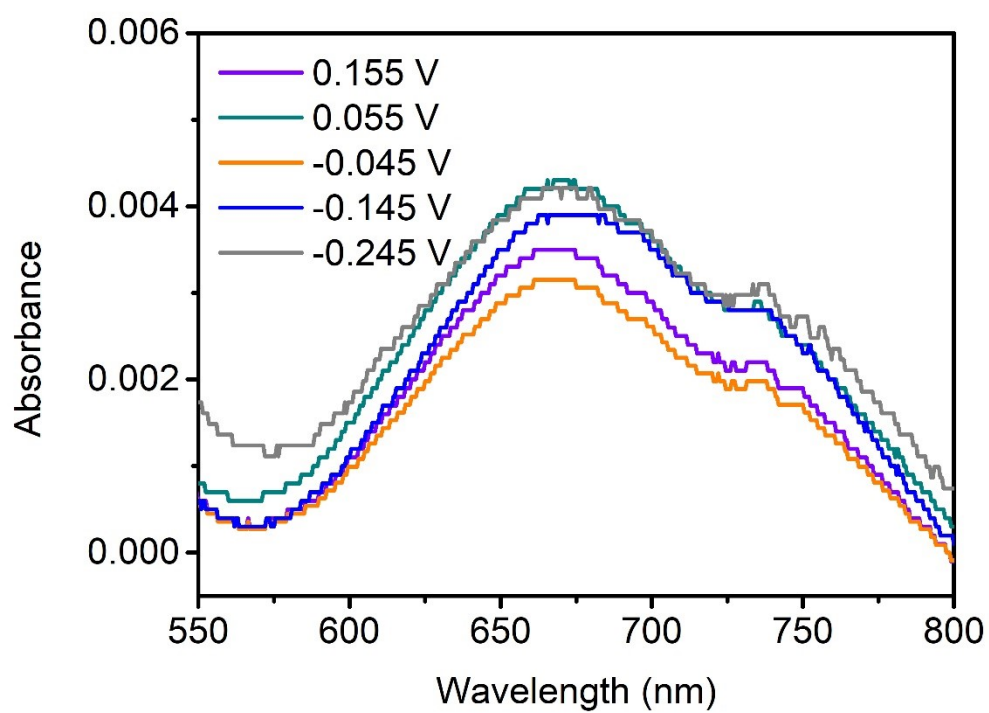

Fig. S4. UV-vis absorption spectra of the Ar-saturated 0.1 M Na<sub>2</sub>SO<sub>4</sub> electrolytes after NRR at different applied potentials for Mn<sub>SA</sub>/GDY.

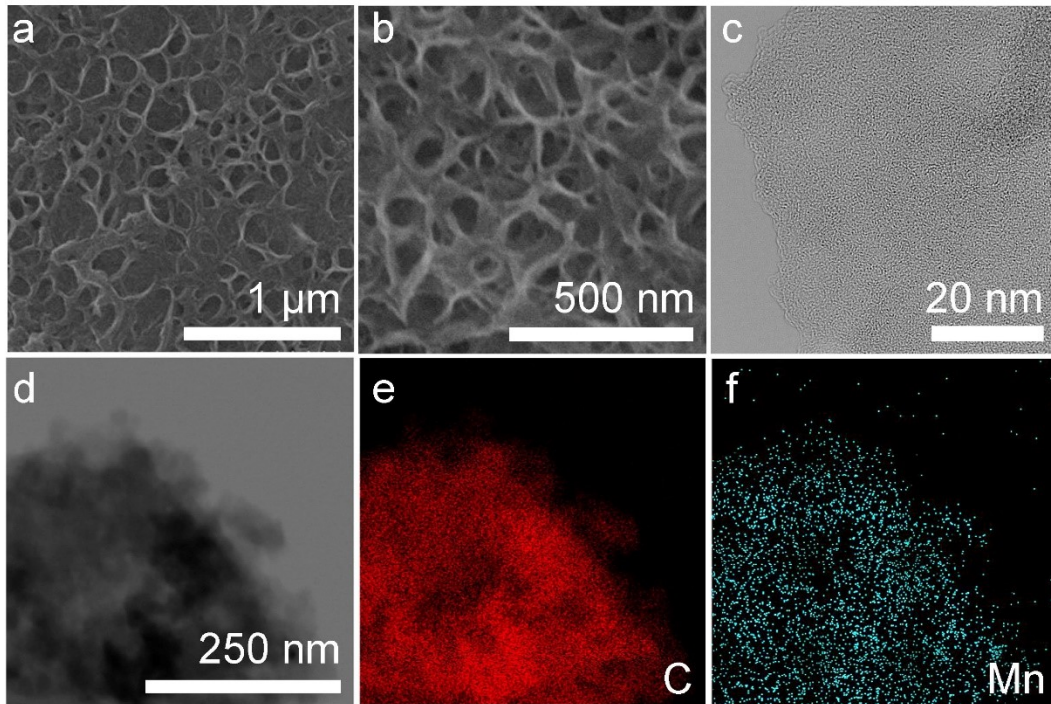

Fig. S5. (a-b) SEM images of Mn<sub>SA</sub>/GDY after durability test. (c) High-resolution TEM image of Mn<sub>SA</sub>/GDY after durability test. (d-f) STEM image and corresponding EDX elemental mapping results of Mn<sub>SA</sub>/GDY after durability test



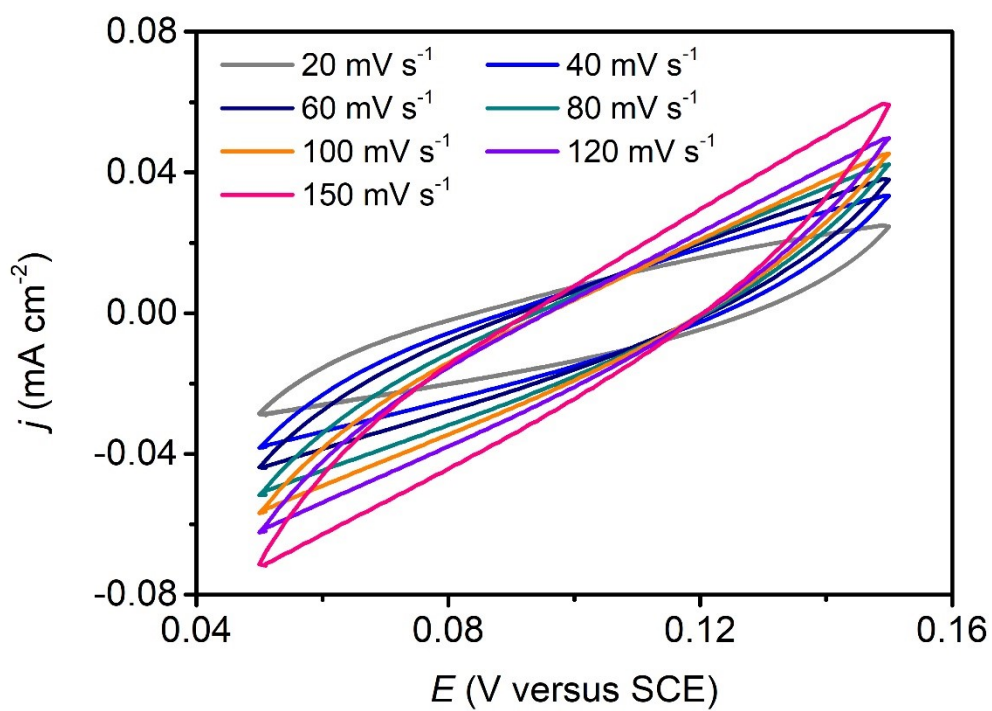

Fig. S6. CV curves of GDY recorded at different scan rates for  $C_{dl}$  estimation.

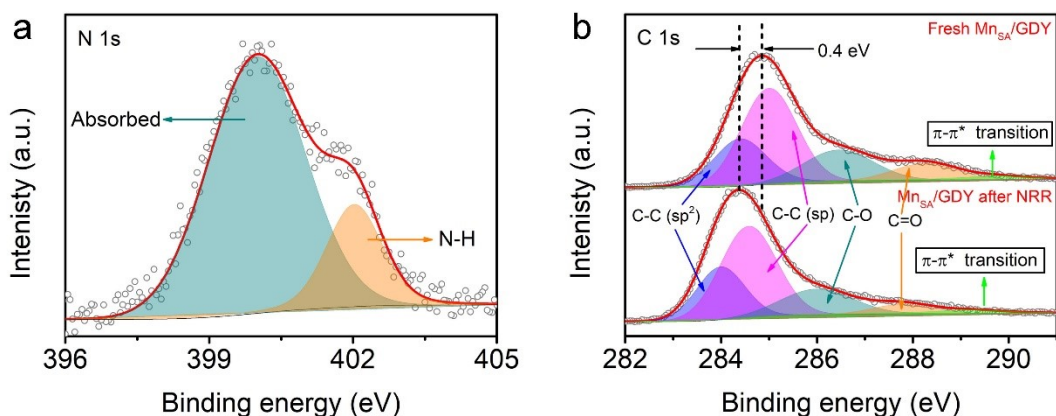

Fig. S7. (a) The N 1s XPS spectrum of  $\text{Mn}_{\text{SA}}/\text{GDY}$  after cycling stability test. (b) The C 1s XPS spectra of  $\text{Mn}_{\text{SA}}/\text{GDY}$  after cycling stability test.

The N 1s XPS spectrum of  $\text{Mn}_{\text{SA}}/\text{GDY}$  after cycling stability test was deconvoluted into two subpeaks attributed to the N-H bond absorbed  $\text{N}_2$  respectively, which indicated the absorbance of  $\text{N}_2$  and ammonia products as well as the corresponding intermediates on the surface of  $\text{Mn}_{\text{SA}}/\text{GDY}$ . The lower binding energy of C element of  $\text{Mn}_{\text{SA}}/\text{GDY}$  after nitrogen reduction reaction suggested the more electron-rich characteristic of GDY implying the trend of charge transfer from Mn atoms to GDY during electrocatalysis.

Table S1  $Y_{\text{NH}_3}$  and FE of  $\text{Mn}_{\text{SA}}/\text{GDY}$  for repetitive NRR tests at -0.045 V versus RHE in 0.1 M  $\text{Na}_2\text{SO}_4$ .

| <b>Repetitive time</b> | <b>1</b>                                                                                                    | <b>2</b>                                                                                                    | <b>3</b>                                                                                                     |
|------------------------|-------------------------------------------------------------------------------------------------------------|-------------------------------------------------------------------------------------------------------------|--------------------------------------------------------------------------------------------------------------|
| <b>Yield</b>           | 44.02 $\mu\text{g h}^{-1} \text{mg}_{\text{cat.}}^{-1}$<br>(1.11e-10 mol s <sup>-1</sup> cm <sup>-2</sup> ) | 45.24 $\mu\text{g h}^{-1} \text{mg}_{\text{cat.}}^{-1}$<br>(1.15e-10 mol s <sup>-1</sup> cm <sup>-2</sup> ) | 46.78 $\mu\text{g h}^{-1} \text{mg}_{\text{cat.}}^{-1}$<br>(1.54 e-10 mol s <sup>-1</sup> cm <sup>-2</sup> ) |
| <b>FE</b>              | 35.53%                                                                                                      | 38.90%                                                                                                      | 39.83%                                                                                                       |

Table S2 Comparison of  $Y_{\text{NH}_3}$  and FE of  $\text{Mn}_{\text{SA}}/\text{GDY}$  with previously reported electrocatalysts.

| Electrocatalyst                        | Yield                                                                                                     | FE (%) | Ref.      |
|----------------------------------------|-----------------------------------------------------------------------------------------------------------|--------|-----------|
| $\text{Mn}_{\text{SA}}/\text{GDY}$     | 46.78 $\mu\text{g h}^{-1} \text{mg}_{\text{cat.}}^{-1}$<br>(1.54e-10 $\text{mol s}^{-1} \text{cm}^{-2}$ ) | 39.83  | This work |
| SA Ru-Mo <sub>2</sub> CT <sub>x</sub>  | 40.57 $\mu\text{g h}^{-1} \text{mg}_{\text{cat.}}^{-1}$                                                   | 25.77  | [1]       |
| Zn/Fe-N-C                              | 30.5 $\mu\text{g h}^{-1} \text{mg}_{\text{cat.}}^{-1}$                                                    | 26.5   | [2]       |
| Mn-N-C SAC                             | 21.43 $\mu\text{g h}^{-1} \text{mg}_{\text{cat.}}^{-1}$                                                   | 32.02  | [3]       |
| Fe <sub>SA</sub> -NO-C                 | 31.9 $\mu\text{g h}^{-1} \text{mg}_{\text{cat.}}^{-1}$                                                    | 11.8   | [4]       |
| Ru SAs/g-C <sub>3</sub> N <sub>4</sub> | 23.0 $\mu\text{g h}^{-1} \text{mg}_{\text{cat.}}^{-1}$                                                    | 8.3    | [5]       |
| Zr-TiO <sub>2</sub>                    | 8.9 $\mu\text{g h}^{-1} \text{cm}^{-2}$                                                                   | 17.3   | [6]       |
| C-Ti <sub>x</sub> O <sub>y</sub> /C    | 14.8 $\mu\text{g h}^{-1} \text{mg}_{\text{cat.}}^{-1}$                                                    | 17.8   | [7]       |
| W <sub>18</sub> O <sub>49</sub> -16Fe  | 24.7 $\mu\text{g h}^{-1} \text{mg}_{\text{cat.}}^{-1}$                                                    | 20.0   | [8]       |
| Ru <sub>2</sub> P-rGO                  | 32.8 $\mu\text{g h}^{-1} \text{mg}_{\text{cat.}}^{-1}$                                                    | 13.04  | [9]       |
| Cu/PI-300                              | 17.2 $\mu\text{g h}^{-1} \text{cm}^{-2}$                                                                  | 6.56   | [10]      |
| Co-MoS <sub>2-x</sub>                  | 5.44 $\mu\text{g h}^{-1} \text{mg}_{\text{cat.}}^{-1}$                                                    | 1.7    | [11]      |

Table S3 Impedance parameters derived from the fitted equivalent circuit for the impedance spectra recorded in 0.1 M Na<sub>2</sub>SO<sub>4</sub>.

| <b>Electrocatalyst</b>                     | <b>Mn<sub>S</sub>A/GDY</b> | <b>GDY</b> |
|--------------------------------------------|----------------------------|------------|
| R <sub>s</sub> (ohm)                       | 13.44                      | 13.8       |
| CPE1, Y <sub>o</sub> (S-sec <sup>n</sup> ) | 1.66e-3                    | 3.10e-2    |
| n                                          | 0.56                       | 0.47       |
| R <sub>ct</sub> (ohm)                      | 2.41                       | 3.41       |
| CPE2, Y <sub>o</sub> (S-sec <sup>n</sup> ) | 5.53e-4                    | 3.34e-3    |
| n                                          | 0.79                       | 0.94       |
| R <sub>a</sub> (ohm)                       | 882.70                     | 560.90     |

Table S4 Yields and FEs of Mn<sub>SA</sub>/GDY with different Mn atoms mass loading.

| <b>Mass loading (wt. %)</b> | <b>Yield (<math>\mu\text{g h}^{-1} \text{mg}_{\text{cat.}}^{-1}</math>)</b> | <b>FE (%)</b> |
|-----------------------------|-----------------------------------------------------------------------------|---------------|
| 0.19                        | 46.78 $\mu\text{g h}^{-1} \text{mg}_{\text{cat.}}^{-1}$                     | 39.83         |
| 0.10                        | 28.03 $\mu\text{g h}^{-1} \text{mg}_{\text{cat.}}^{-1}$                     | 27.74         |
| 0.07                        | 11.69 $\mu\text{g h}^{-1} \text{mg}_{\text{cat.}}^{-1}$                     | 19.51         |

## References

1. W. Peng, M. Luo, X. Xu, K. Jiang, M. Peng, D. Chen, T. Chan and Y. Tan, *Adv. Energy Mater.*, 2020, **10**, 2001364.
2. L. Zhang, G. Fan, W. Xu, M. Yu, L. Wang, Z. Yan and F. Cheng, *Chem. Commun.*, 2020, **56**, 11957-11960.
3. X. Wang, D. Wu, S. Liu, J. Zhang, X. Fu and J. Luo, *Nano-Micro Letter*, 2021, **13**, 125.
4. Y. Li, J. Li, J. Huang, J. Chen, Y. Kong, B. Yang, Z. Li, L. Lei, G. Chai, Z. Wen, L. Dai, and Y. Hou, *Angew. Chem. Int. Ed.*, 2021, **60**, 9078-9085.
5. B. Yu, H. Li, J. White, S. Donne, J. Yi, S. Xi, Y. Fu, G. Henkelman, H. Yu, Z. Chen and T. Ma, *Adv. Funct. Mater.*, 2020, **30**, 1905665.
6. N. Cao, Z. Chen, K. Zang, J. Xu, J. Zhong, J. Luo, X. Xu and G. Zheng, *Nat. Commun.*, 2019, **10**, 2877.
7. Q. Qin, Y. Zhao, M. Schmallegger, T. Heil, J. Schmidt, R. Walczak, G. Gescheidt-Demner, H. Jiao and M. Oschatz, *Angew. Chem. Int. Ed.*, 2019, **58**, 13101-13106.
8. R. Zhao, C. Liu, X. Zhang, X. Zhu, P. Wei, L. Ji, Y. Guo, S. Gao, Y. Luo, Z. Wang and X. Sun, *J. Mater. Chem. A*, 2020, **8**, 77.
9. Y. Tong, H. Guo, D. Liu, X. Yan, P. Su, J. Liang, S. Zhou, J. Liu, G. Lu and S. Dou, *Angew. Chem. Int. Ed.*, 2020, **59**, 7356-7361.
10. Y. Lin, S. Zhang, Z. Xue, J. Zhang, H. Su, T. Zhao, G. Zhai, X. Li, M. Antonietti and J. Chen, *Nat. Commun.*, 2019, **10**, 4380.
11. J. Zhang, X. Tian, M. Liu, H. Guo, J. Zhou, Q. Fang, Z. Liu, Q. Wu and J. Lou, *J. Am. Chem. Soc.*, 2019, **141**, 19269-19275.
